# Supplementary material
Source: Springer Nature journal article supplement (https://www.springermedizin.de/resource/supplementary/12879_2013_2765_MOESM3_ESM.pdf/9445352)

# 25-OH-Vitamin D

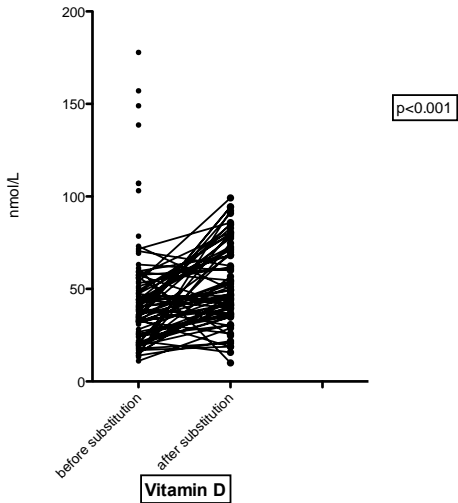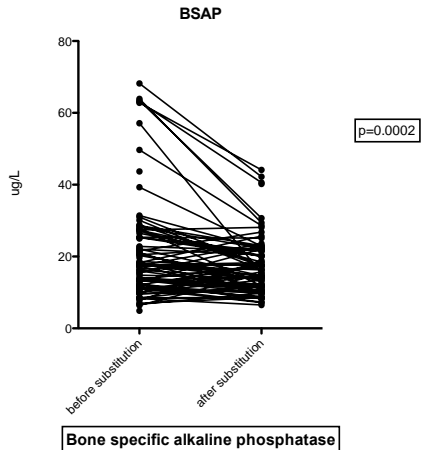

Supplement: MOESM3 [file 9445352]
